# Supplementary material for: Optimizing the synthesis of SnO2/TiO2/RGO nanocomposites with excellent visible light photocatalytic and antibacterial activities
Source: Royal Society of Chemistry journal article supplement (doi:10.1039/c9pp00242a), 2019-11-11
Supplement: c9pp00242a1.pdf [file c9pp00242a1.pdf]

**Optimizing synthesis of SnO<sub>2</sub>/TiO<sub>2</sub>/RGO nanocomposites with excellent visible  
light photocatalytic and antibacterial activities**

Shujuan Yao<sup>1</sup>, Shanshan Zhou<sup>1</sup>, Jie Wang<sup>1</sup>, Wenzhi Li<sup>1</sup>, Zihui Li<sup>2</sup>

1. School of Materials Science and Engineering, Liaocheng University, Liaocheng, 252000, P. R.

China

2. Clinical laboratory, Liaocheng People's Hospital of Taishan Medical University, Liaocheng,

252000, P. R. China

Corresponding author: Zihui Li

Email: liyu6655@163.com

## Supporting Informations

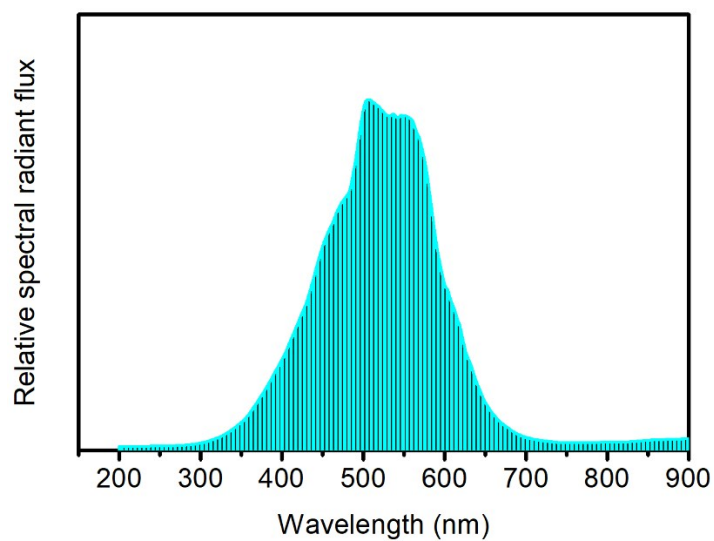

**Fig. S1** Emission spectrum of halogen tungsten lamp.

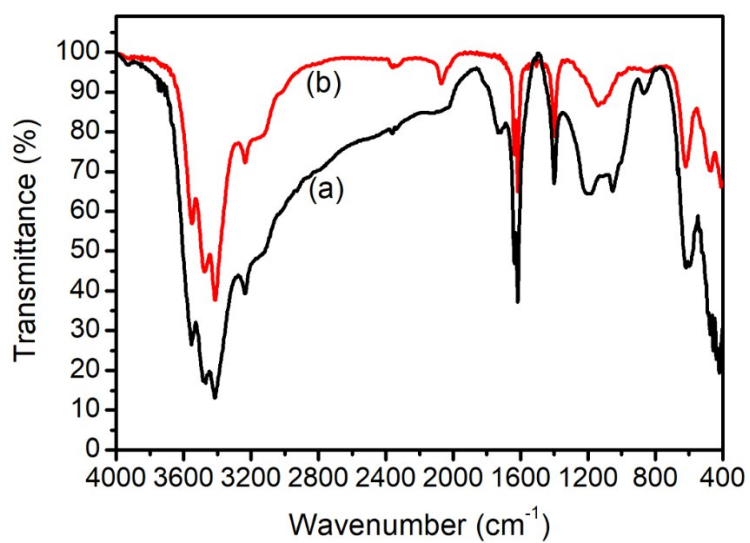

**Fig. S2** FTIR spectra of (a) GO and (b) STG1.

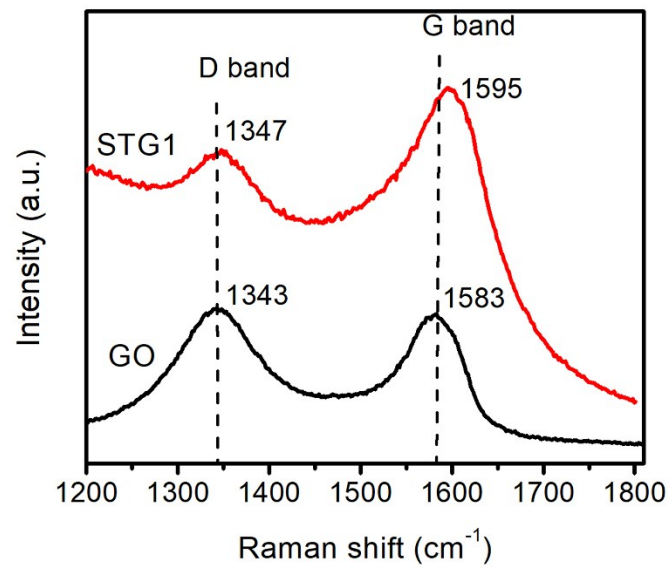

**Fig. S3** Raman spectra of GO and STG1 samples.

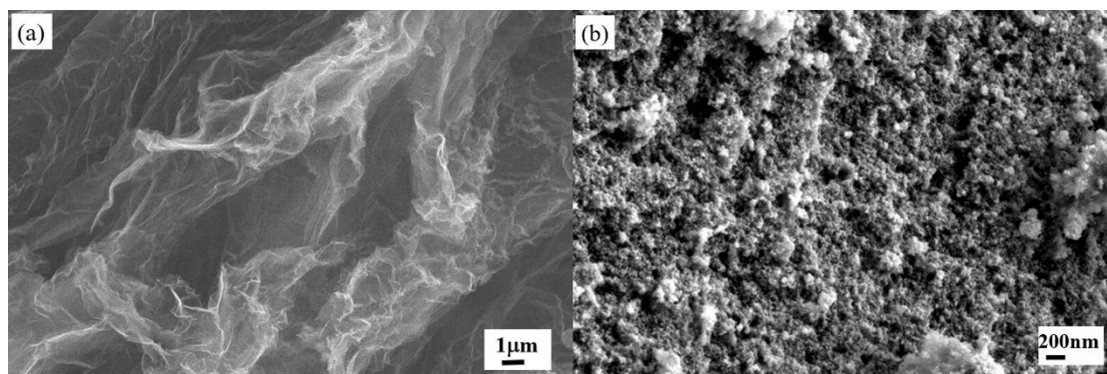

**Fig. S4** SEM images of (a) rGO after solvothermal treatment, (b) as-prepared TiO<sub>2</sub>.

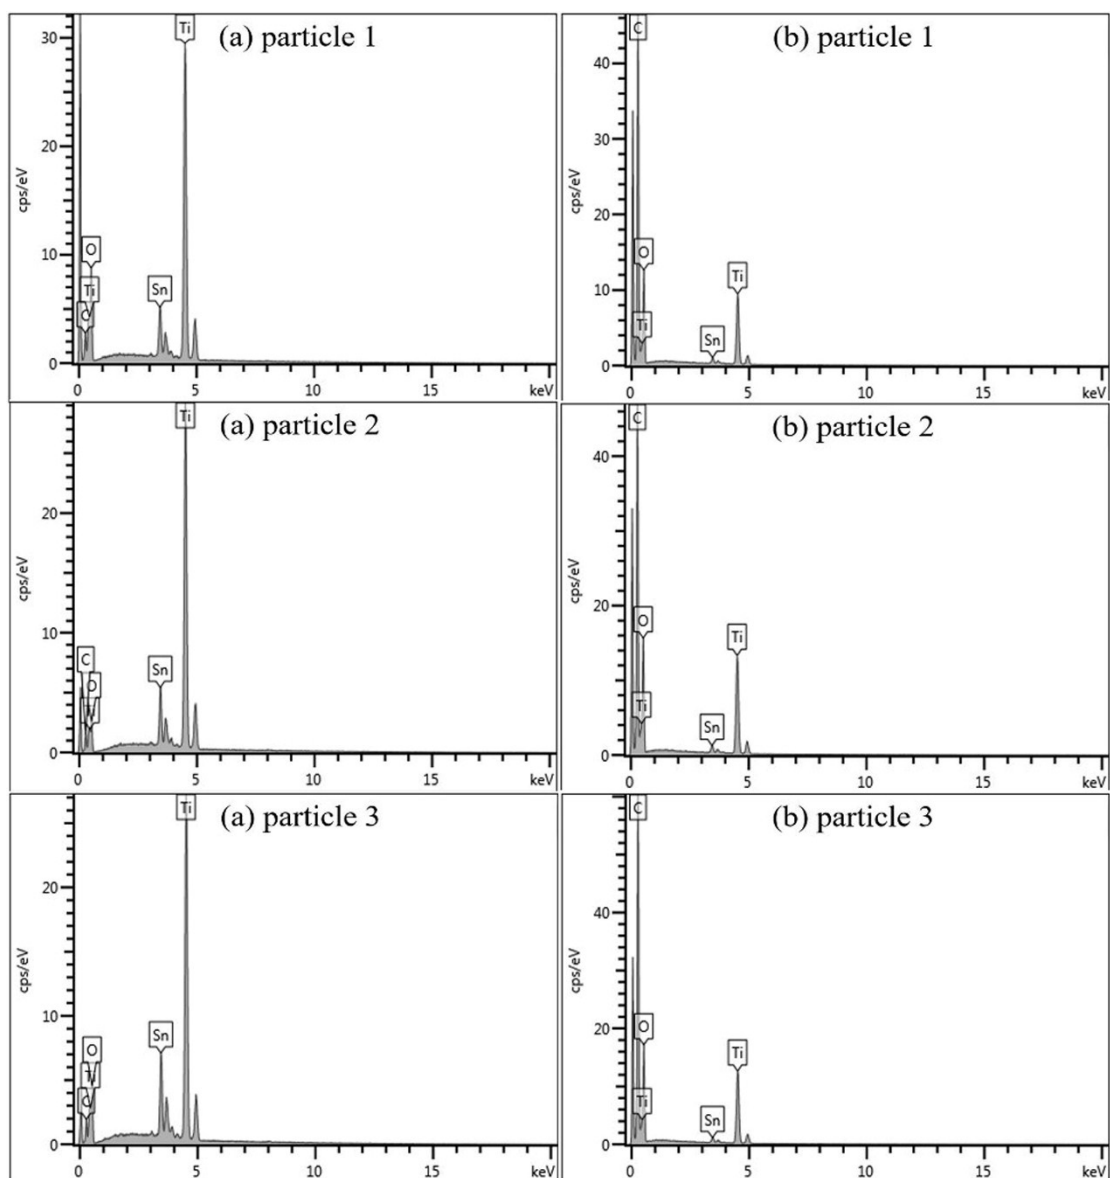

**Fig. S5** EDS spectrums of different particles in (a) STG1 and (b) STG2.

**Table S1** The elemental composition from EDS result.

| STG1       | Elements (at%) |      |       |        |
|------------|----------------|------|-------|--------|
|            | Ti             | Sn   | O     | Ti:Sn  |
| Particle 1 | 22.01          | 2.27 | 61.21 | 9.70/1 |
| Particle 2 | 39.53          | 4.19 | 41.79 | 9.43/1 |
| Particle 3 | 29.98          | 3.61 | 52.62 | 8.30/1 |

**Table S2** The elemental composition from EDS result.

| STG2       | Elements (at%) |      |       |         |
|------------|----------------|------|-------|---------|
|            | Ti             | Sn   | O     | Ti:Sn   |
| Particle 1 | 3.05           | 0.16 | 29.45 | 19.06/1 |
| Particle 2 | 3.79           | 0.19 | 32.54 | 19.95/1 |
| Particle 3 | 3.13           | 0.15 | 30.29 | 20.87/1 |
